# Supplementary material for: PPy@h-MoO3 nanorods as the cathode material for high-efficiency lithium-ion batteries
Source: Royal Society of Chemistry journal article supplement (doi:10.1039/d4nj02158d), 2024-01-01
Supplement: d4nj02158d1.pdf [file d4nj02158d1.pdf]

## Supporting Information

### PPy@h-MoO<sub>3</sub> nanorods as cathode material for high-efficiency lithium-ion batteries

Reddeppa Nadimicherla<sup>a,b,c</sup>, Luyi Chen<sup>c</sup>, Siddheshwar Dadarao Raut<sup>a</sup>, Won Chul Cho<sup>a\*</sup>

<sup>a</sup>*Department of Future Energy Convergence, Seoul National University of Science & Technology,  
232 Gongneung-ro, Nowon-gu, Seoul 01811, Republic of Korea*

<sup>b</sup>*Department of physics, Madanapalle Institute of Technology and Science, Madanapalle,  
517325, India*

<sup>c</sup>*Materials Science Institute, PCFM Lab and GDHPRC Lab, School of Chemistry, Sun Yat-Sen  
University, Guangzhou 510275, P. R. China*

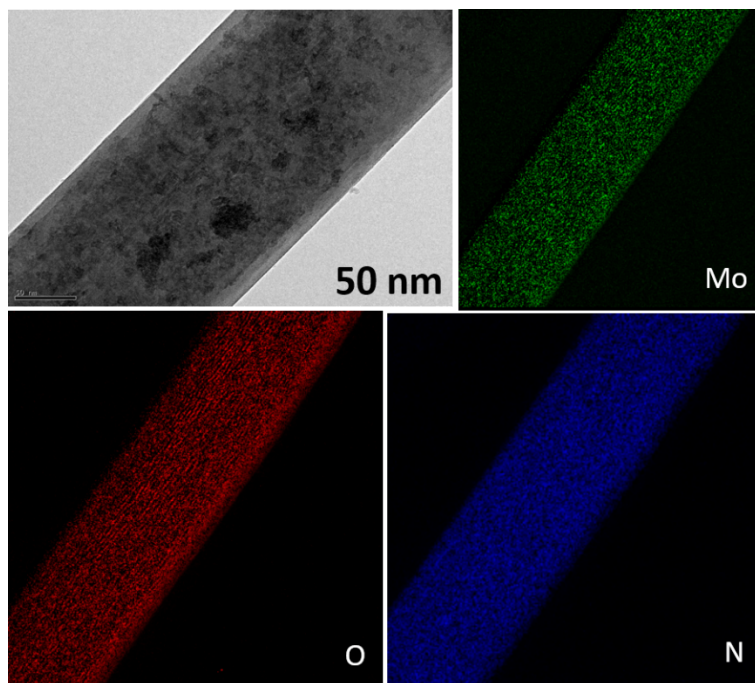

**Figure S1** TEM and EDS mapping of PPy@h-MoO<sub>3</sub> NRs and the related elemental mapping of Mo (green), O (red) and N (blue).

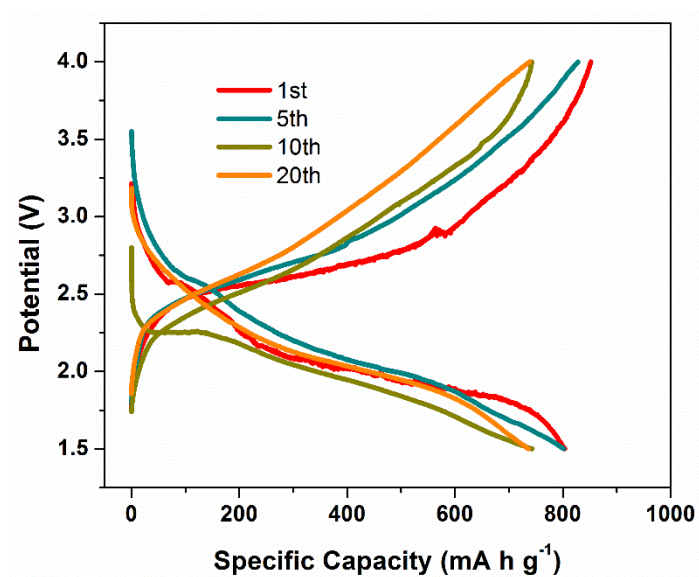

**Figure S2** Charge-discharge voltage profiles of h-MoO<sub>3</sub> NRs for different cycles at voltage of 1.5-4 V.

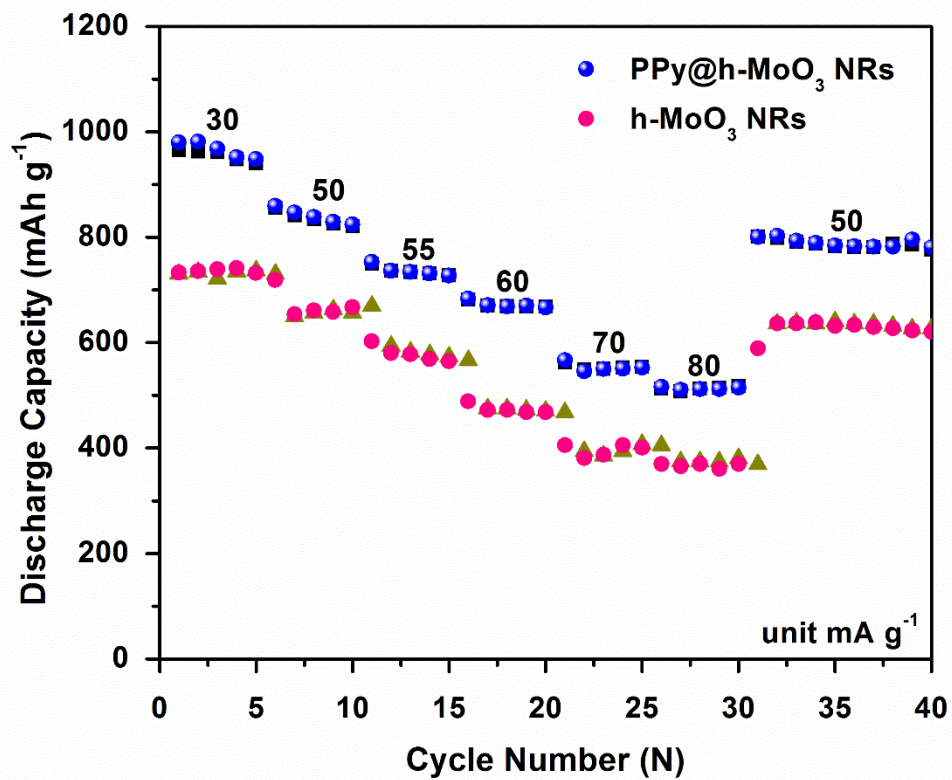

**Figure S3** Rate capability of PPy@h-MoO<sub>3</sub> NRs and h-MoO<sub>3</sub> NRs cathodes at various current densities.

**Table S1.** State-of-the-art of LIBs comparison of present cathode material performance with previously reported data.

| Cathode Material/Morphology                          | Capacity (mA h g <sup>-1</sup> ) | Current density (mA g <sup>-1</sup> ) | Cycles     | Ref.             |
|------------------------------------------------------|----------------------------------|---------------------------------------|------------|------------------|
| <b>h-MoO<sub>3</sub> nanorods</b>                    | <b>852</b>                       | <b>30</b>                             | <b>100</b> | <b>This work</b> |
| <b>PPy@h-MoO<sub>3</sub> nanorods</b>                | <b>954</b>                       | <b>30</b>                             | <b>100</b> |                  |
| <b>PPy@h-MoO<sub>3</sub> nanorods</b>                | <b>289</b>                       | <b>100</b>                            | <b>50</b>  |                  |
| h-MoO <sub>3</sub> nanorods                          | 402                              | 0.1 mA cm <sup>-2</sup>               | NA         | [1]              |
| MoO <sub>3</sub> /PPy nanobelts                      | 302                              | 30                                    | 14         | [2]              |
| MoO <sub>3</sub> /PVP/PVA nanobelts                  | 303                              | NA                                    | 10         | [3]              |
| MoO <sub>3</sub> /PEG nanobelts                      | 313                              | 0.4 mA cm <sup>-2</sup>               | 20         | [4]              |
| V <sub>2</sub> O <sub>5</sub> doped MoO <sub>3</sub> | 280                              | 50                                    | 50         | [5]              |
| α-MoO <sub>3</sub> nanobelts                         | 264                              | 30                                    | 50         | [6]              |
| α-MoO <sub>3</sub> nanobelts                         | 140                              | 200                                   | 50         | [7]              |
| α-MoO <sub>3</sub> nanofibers                        | 250                              | 74                                    | 100        | [8]              |
| α-MoO <sub>3</sub> nanobelts                         | 400                              | 0.1 mA cm <sup>-2</sup>               | 30         | [9]              |
| MoO <sub>3</sub> /graphene                           | 291                              | 100                                   | 100        | [10]             |
| h-MoO <sub>3</sub> nanoparticles                     | 120                              | 20                                    | 25         | [11]             |

## References

1. J. Song, X. Wang, X. Ni, H. Zheng, Z. Zhang, M. Ji, T. Shen and X. Wang, *Mat. Res. Bull.*, 2005, **40**, 1751-1756.
2. Ch.V. S. Reddy, Z.R. Deng, Q.Y. zhu, Y. Dai, J. Zhou, W. Chen and S.-I. Mho, *Appl. Phys. A*, 2007, **89**, 995-999.
3. Ch.V. S. Reddy, Y. Y. Qi, W. Jin, Q.Y. Zhu, Z.R. Deng, W. Chen and S.-I. Mho, *J. Solid State Electrochem.*, 2007, **11**, 1239-1243.
4. Ch.V. S. Reddy, E. H. Walker Jr., C. Wen, S.-I. Mho, *J. Power Sources*, 2008, **183**, 330-333.
5. X. Wei, L. Jiao, S. Liu, J. Sun, W. Peng, H. Gao, Y. Si and H. Yuan, *J. Alloy. Compd.*, 2009, **486**, 672-676.
6. L. Zhou, L. Yang, P. Yuan, J. Zou, Y. Wu and C. Yu, *J. Phys. Chem. C*, 2010, **114**, 21868-21872.
7. U. K. Sen and S. Mitra, *RSC Adv.*, 2012, **2**, 11123-11131.
8. A.M. Hashem, H. Groult, A. Mauger, K. Zaghi and C.M. Julien, *J. Power Sources*, 2012, **219** 126-132.
9. B. Gao, H. Fan and X. Zhang, *J. Phys. Chem. Solids*, 2012, **73**, 423-429.
10. L. Noerochim, J.-Z. Wang, D. Wexler, Z. Chao and H.-K. Liu, *J. Power Sources*, 2013, **228**, 198-205.
11. Y. Xu, L. Xie, Y. Zhang, and X. Cao, *Electron. Mater. Lett.*, 2013, **9**, 693-696.
